# Supplementary material for: Monoclonal antibodies from humans with Mycobacterium tuberculosis exposure or latent infection recognize distinct arabinomannan epitopes
Source: PubMed Central journal article supplement (PMC8511196; doi:10.1038/s42003-021-02714-w), 2021-10-12
Supplement: 42003_2021_2714_MOESM2_ESM.pdf [file 42003_2021_2714_MOESM2_ESM.pdf]

## Supplementary Figures:

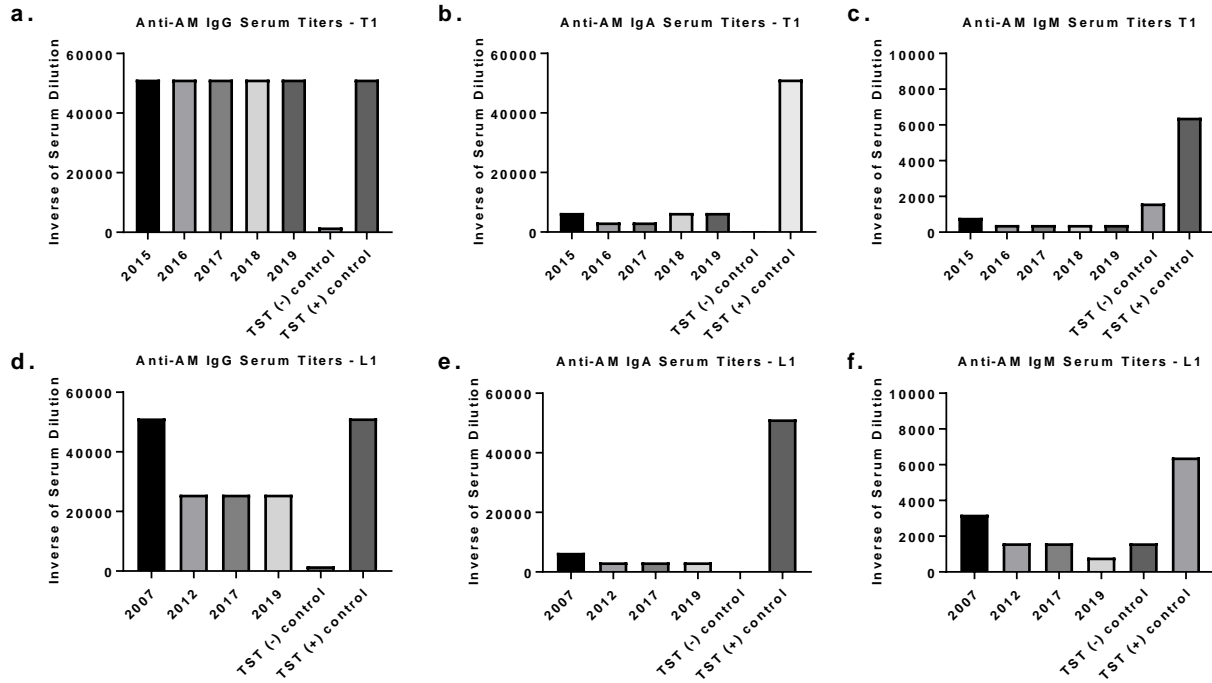

**Supplementary Figure 1. Anti-AM immunoglobulin titers in sera of subjects T1 and L1 over several years.** Anti-AM IgG, IgA, and IgM titers from subject T1 (a-c) and subject L1 (d-f) by ELISA. Endpoint titers were defined as having an optical density at least 3 standard deviations above background after subtraction of nonspecific (BSA) signal.

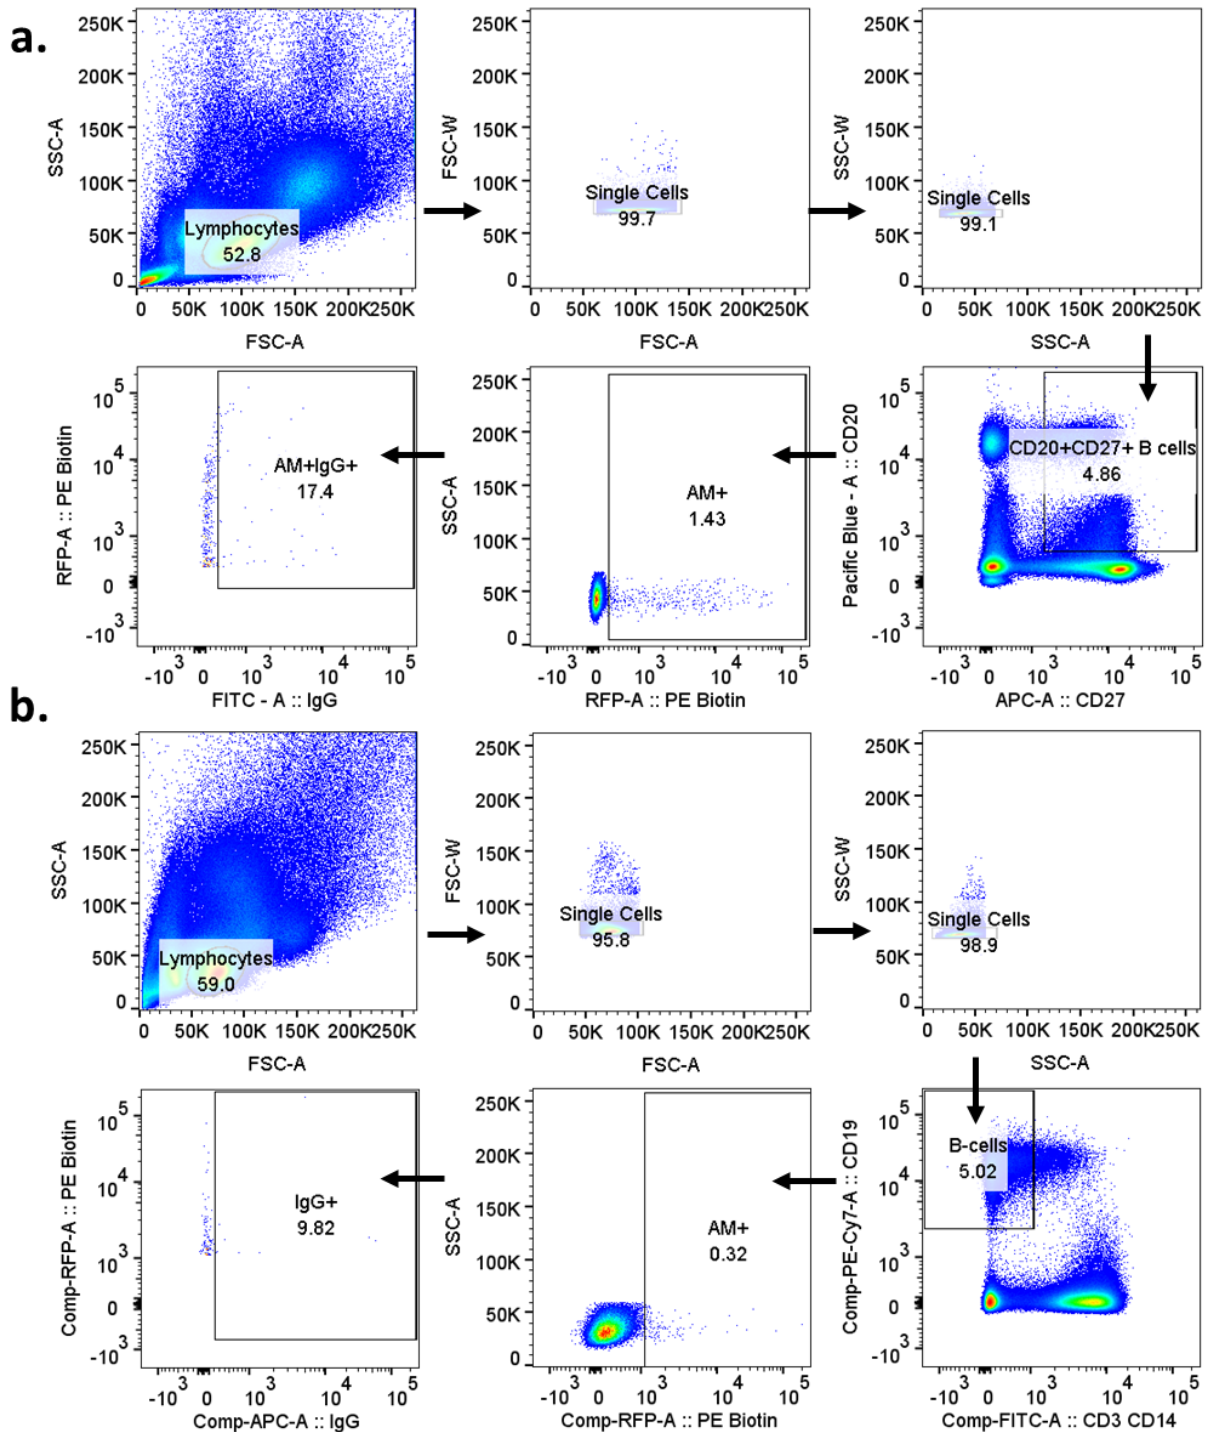

**Supplementary Figure 2. Anti-AM specific human B cells sorting strategies.**

**(a)** Gating of CD20+, CD27+, AM+, IgG+ memory B cells from a sample of peripheral blood mononuclear cells (PBMC) collected from subject T1. **(b)** Gating of CD19+, AM+, IgG+, B cells from a sample of PBMC collected from subject L1.

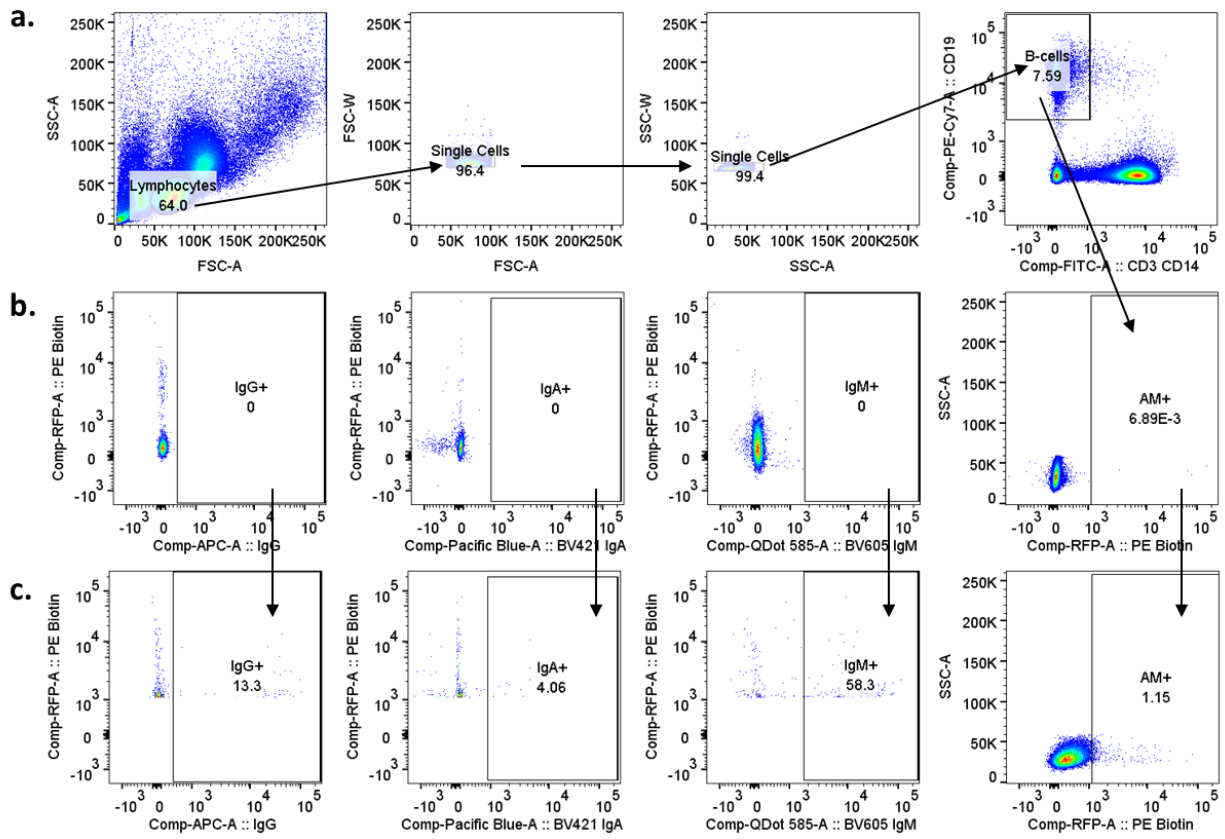

**Supplementary Figure 3. Representative gating strategy using Fluorescence minus one (FMO) controls (a)** Lymphocytes and single cells are gated, followed by live B cells. **(b)** Fluorescence minus one (FMO) controls are shown for PE (biotinylated AM), APC (IgG), BV421 (IgA), and BV605 (IgM). **(c)** Frequency of anti-AM human B cells from Subject T1.

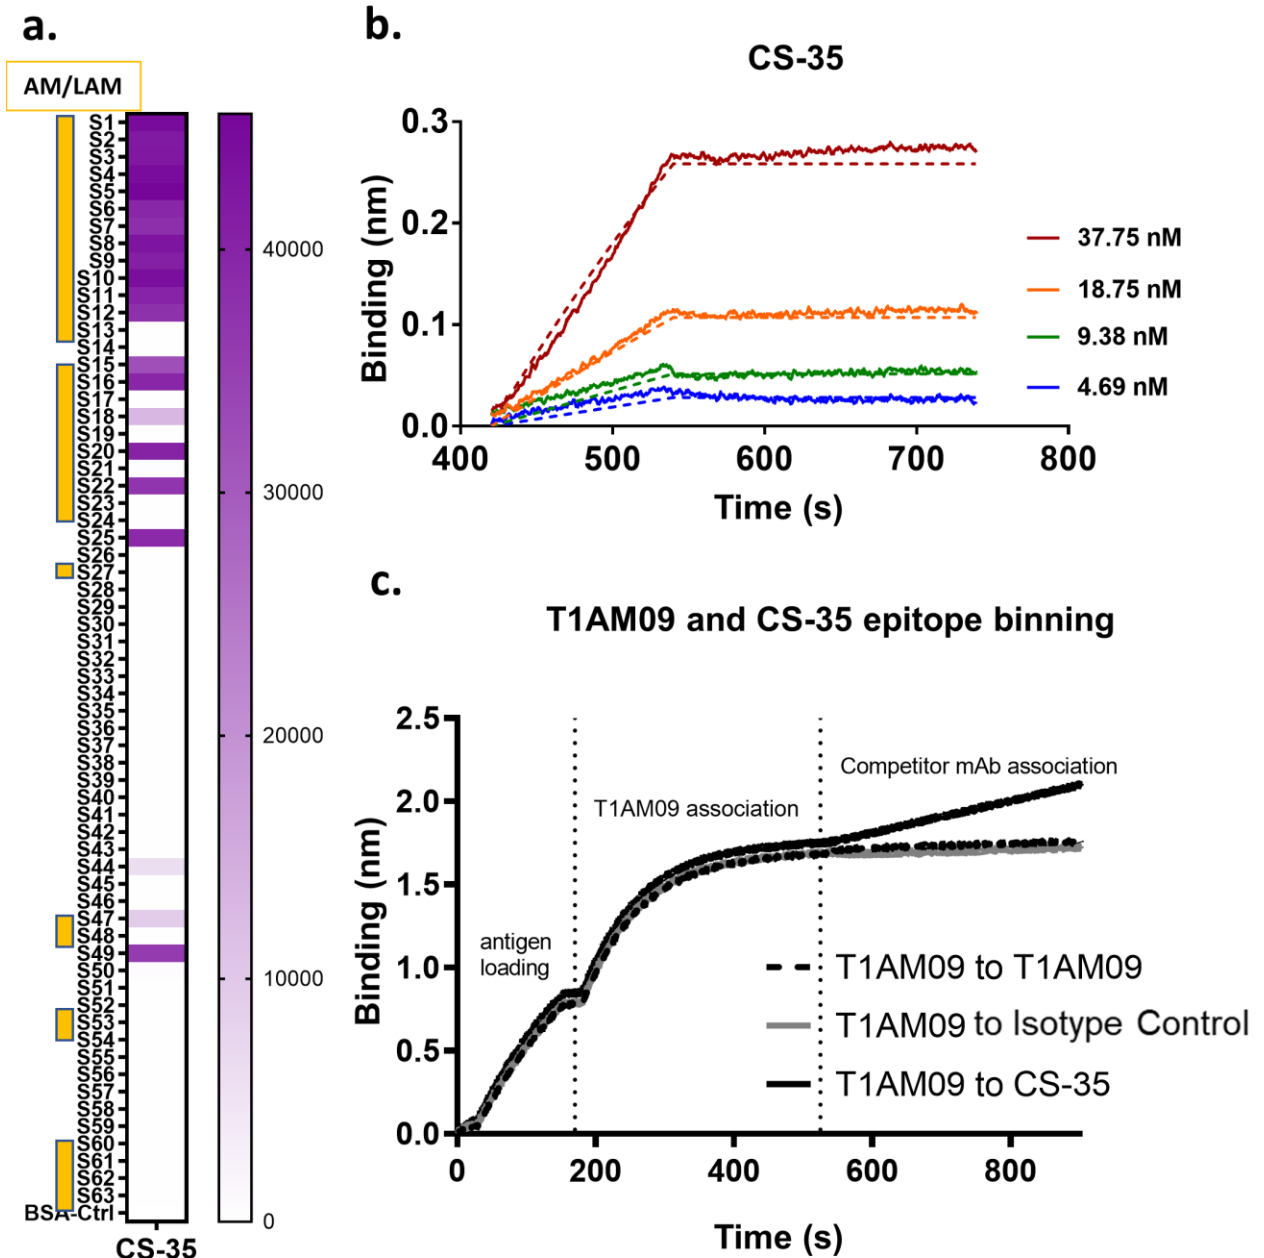

**Supplementary Figure 4. Murine anti-LAM mAb CS-35 has distinct binding characteristics from human anti-AM mAbs T1AM09 and L1AM04. (a)** CS-35 glycan fingerprint; arabinomannan/lipoarabinomannan (AM/LAM) specific fragments (S#1-12, 15-22, 25, 44, 45, 49, 50, 56-59) are marked by the yellow side bar. Six other glycans on the array are:  $\alpha$ -glucan (S#13, 14, 24, 46, 48, 52), trehalose mycolates and lipooligosachharides (LOSs; S#38, 39, 54, 55), phenolic glycolipids (PGLs; S#26-37, 40-43, 50, 53), phosphatidyl-myoinositol mannosides (PIMs, S#23) and glycopeptidolipids (GPLs; S#47, 60, 61). **(b)** Binding curve of CS-35 binding to biotinylated AM generated by BLI solid lines represent experimental data and dashed lines are statistically fitted curves;  $K_{D,app}$ :  $1.0 \text{ E-}12 \text{ M}$  **(c)** Two-phase binding experiment detecting T1AM09 competition with CS-35. Binding to self (T1AM09) and to isotype control mAb are negative controls.

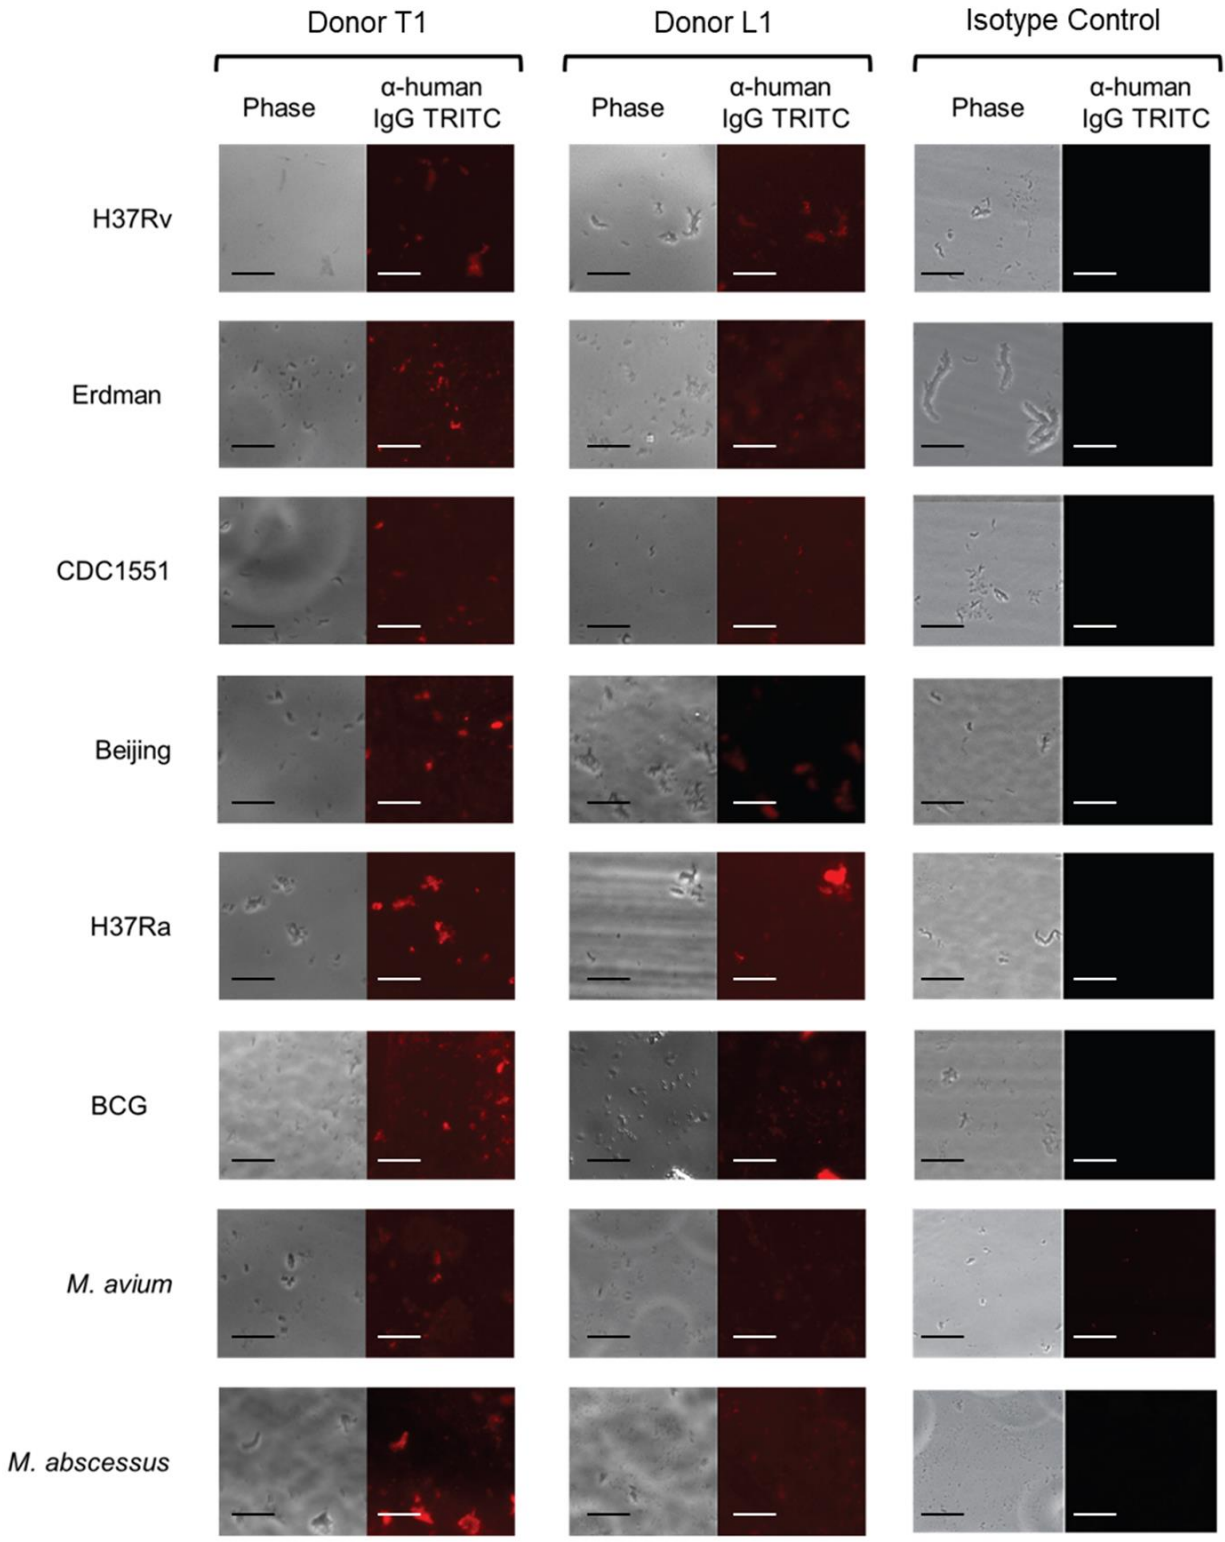

**Supplementary Figure 5. Binding of donor sera (T1 and L1; 1:100) and negative control (human IgG1; 10  $\mu$ g/ml) to mycobacteria strains (scale bar 10  $\mu$ m).**

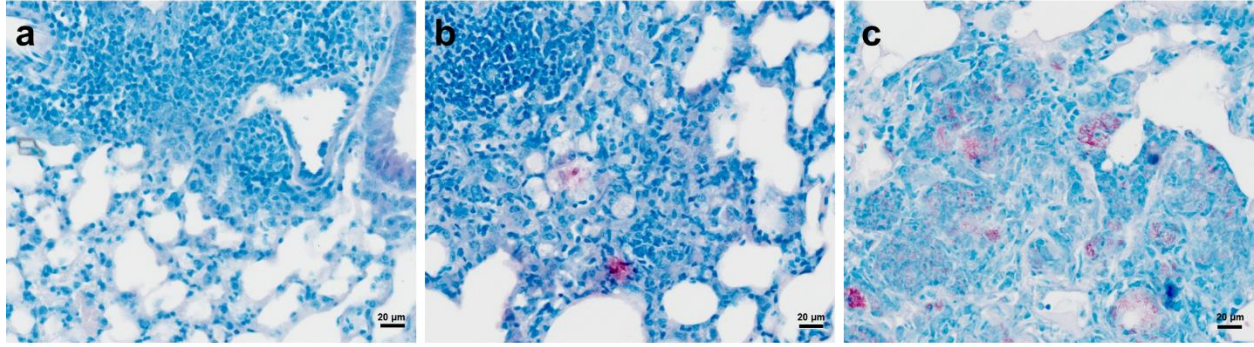

**Supplementary Figure 6. Fite's Method lacks sensitivity for *Mtb* CDC1551 and Erdman in murine infected tissue.** (a) AFB staining of murine lungs infected with *Mtb* (CDC1551); (b) AFB staining of murine lungs murine lungs infected with *Mtb* (Erdman) arrow – indicates only positive staining in the lung; (c) *Mtb*-infected murine lung tissue provided by the Einstein Histology and Pathology Core was used as a positive control for Fite's method (scale bar 20 µm).

**Supplementary Tables:****Supplementary Table 1.** Characteristics of heavy and kappa chain and percent nucleotide identity for mAbs generated from subject T1

| <b>Antibody ID</b>     | <b>Heavy V Gene</b> | <b>CDRH3 Length (AA)</b> | <b>VH Identity (nt %)</b> | <b>Kappa V Gene</b> | <b>CDRL3 Length (AA)</b> | <b>VK Identity (nt %)</b> |
|------------------------|---------------------|--------------------------|---------------------------|---------------------|--------------------------|---------------------------|
| <b>T1AM05</b>          | 5-10-1*01           | 13                       | 92.71                     | 1-5*03              | 9                        | 94.98                     |
| <b>T1AM06</b>          | 2-15*01             | 14                       | 90.14                     | 3-20*01             | 10                       | 92.31                     |
| <b>T1AM07</b>          | 3-23*01             | 16                       | 88.19                     | 3-20*01             | 8                        | 87.23                     |
| <b>T1AM09</b>          | 1-2*02              | 14                       | 91.32                     | 1-39*01             | 9                        | 89.96                     |
| <b>T1AM11</b>          | 3-66*01             | 8                        | 91.58                     | 1-33*01             | 8                        | 89.96                     |
| <b>T1AM13</b>          | 3-7*01              | 21                       | 93.06                     | 4-2*01              | 10                       | 95.96                     |
| <b>T1AM16</b>          | 1-2*02              | 16                       | 96.18                     | 3-11*01             | 10                       | 95.70                     |
| <b>T1AM39</b>          | 3-30-3*01           | 10                       | 96.18                     | 3-20*01             | 11                       | 92.11                     |
| <b>T1AM47</b>          | 3-7*02              | 14                       | 95.49                     | 3-20*01             | 8                        | 98.21                     |
| Average % nt identity: |                     |                          | 92.76%                    |                     |                          | 92.94%                    |

**Supplementary Table 2.** Characteristics of heavy and kappa chain and percent nucleotide identity for mAbs generated from subject L1

| <b>Antibody ID</b> | <b>Heavy V Gene</b> | <b>CDRH3 Length (AA)</b> | <b>VH Identity (nt %)</b> | <b>Kappa V Gene</b> | <b>CDRL3 Length (AA)</b> | <b>VK Identity (nt %)</b> |
|--------------------|---------------------|--------------------------|---------------------------|---------------------|--------------------------|---------------------------|
| <b>L1AM01</b>      | 1-24*01             | 11                       | 94.44                     | 4-1*01              | 9                        | 91.67                     |
| <b>L1AM03</b>      | 1-3*01              | 12                       | 96.53                     | 1-9*01              | 9                        | 98.21                     |

|                              |         |    |       |         |   |       |
|------------------------------|---------|----|-------|---------|---|-------|
| <b>L1AM04</b>                | 3-23*01 | 13 | 92.01 | 2-24*01 | 9 | 91.84 |
| <b>L1AM05</b>                | 3-15*07 | 12 | 95.58 | 3-20*01 | 9 | 95.39 |
| <b>L1AM08</b>                | 4-4*07  | 14 | 95.44 | 1-39*01 | 9 | 90.68 |
| <b>L1AM10</b>                | 4-4*07  | 14 | 95.79 | 1-9*01  | 9 | 98.21 |
| <b>L1AM13</b>                | 3-21*01 | 16 | 94.79 | 2-24*01 | 9 | 91.84 |
| <b>L1AM14</b>                | 3-15*07 | 12 | 95.58 | 3-20*01 | 9 | 95.39 |
| Average<br>% nt<br>identity: |         |    | 95.02 |         |   | 94.15 |

**Supplementary Table 3.** Maximum and effective concentrations of mAbs binding to arabinomannan (AM) from different mycobacterial strains

|                            | <b>T1AM09</b>     |                             | <b>L1AM04</b>     |                             |
|----------------------------|-------------------|-----------------------------|-------------------|-----------------------------|
|                            | <b>Maximum OD</b> | <b>Average EC50 (µg/ml)</b> | <b>Maximum OD</b> | <b>Average EC50 (µg/ml)</b> |
| RvAM biotin                | 2.0 ± 0.10        | 0.1 ± 0.03                  | 2.2 ± 0.10        | 0.9 ± 0.27                  |
| H37Rv AM                   | 1.9 ± 0.28        | 0.1 ± 0.04                  | 2.1 ± 0.20        | 1.0 ± 0.37                  |
| H37Ra AM                   | 1.9 ± 0.06        | 0.1 ± 0.01                  | 1.3 ± 0.32        | 6.4 ± 5.17                  |
| CDC1551 AM                 | 1.9 ± 0.18        | 0.1 ± 0.03                  | 1.9 ± 0.40        | 1.4 ± 0.18                  |
| Beijing AM                 | 1.9 ± 0.12        | 0.1 ± 0.04                  | 1.8 ± 0.34        | 0.9 ± 0.18                  |
| BCG AM                     | 1.9 ± 0.19        | 0.1 ± 0.03                  | 1.1 ± 0.32        | 9.9 ± 8.61                  |
| p-value (group comparison) | 0.988*            | 0.312*                      | 0.003*            | 0.015^                      |

Optical density (OD<sub>450</sub>) ± standard deviation (SD) and effective concentrations (EC50) ± SD of mAbs (ug/mL) binding to arabinomannan (AM) from mycobacterial strains (\*ANOVA; ^Kruskal-Wallis)
